# Supplementary material
Source: ML conference proceedings conference paper supplement (https://openaccess.thecvf.com/content/CVPR2022/html/Yuan_GLAMR_Global_Occlusion-Aware_CVPR_2022_paper.html)
Supplement: Supplementary file 1 [file Yuan_GLAMR_Global_Occlusion-Aware_CVPR_2022_supplemental.zip]

Archive with 4 entries (4 files):
- GLAMR_supp.pdf
- __MACOSX/._GLAMR_supp.pdf
- results_links.txt
- __MACOSX/._results_links.txt
