# Supplementary material
Source: ML conference proceedings conference paper supplement (https://openaccess.thecvf.com/content/CVPR2022/html/Yuan_GLAMR_Global_Occlusion-Aware_CVPR_2022_paper.html)
Supplement: Supplementary file 1 [file Yuan_GLAMR_Global_Occlusion-Aware_CVPR_2022_supplemental.zip › results_links.txt]

========================================================================
 GLAMR: Global Occlusion-Aware Human Mesh Recovery with Dynamic Cameras
========================================================================

Project page:   https://nvlabs.github.io/GLAMR
Results video:  https://youtu.be/wpObDXcYueo
Code:           https://github.com/NVlabs/GLAMR
